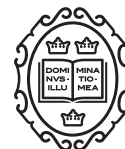

Original article

# Proficiency of data interpretation: identification of signaling SNPs/specific loci for coronary artery disease

Asma N. Cheema<sup>1,2,\*</sup>, Samantha L. Rosenthal<sup>3</sup> and M. Ilyas Kamboh<sup>3</sup>

<sup>1</sup>Atta-Ur-Rahman School of Applied Biosciences, National University of Sciences & Technology, Islamabad, Pakistan, <sup>2</sup>Department of Pathology, University Medical & Dental College, The University of Faisalabad, Faisalabad, Pakistan and <sup>3</sup>Department of Human Genetics, University of Pittsburgh, Pittsburgh, PA, USA

\*Corresponding author: Tel: +92 41 8869861 62, Ext: 170; Fax: +92 41 8868220; Email: asma.cheema4@gmail.com or dr.asma.naseer@tuf.edu.pk

Citation details: Cheema,A.N., Rosenthal,S.L., and Kamboh,M.I. Proficiency of data interpretation: Identification of signaling SNPs/specific loci for coronary artery disease. *Database* (2017) Vol. 2017: article ID bax078; doi:10.1093/database/bax078

Received 25 August 2016; Revised 15 September 2017; Accepted 17 September 2017

## Abstract

Coronary artery disease (CAD) is a complex disorder involving both genetic and non-genetic factors. Genome-wide association studies (GWAS) have identified hundreds of single nucleotides polymorphisms (SNPs) tagging over > 40 CAD risk loci. We hypothesized that some non-coding variants might directly regulate the gene expression rather than tagging a nearby locus. We used RegulomeDB to examine regulatory functions of 58 SNPs identified in two GWAS and those SNPs in linkage disequilibrium (LD) ( $r^2 \geq 0.80$ ) with the GWAS SNPs. Of the tested 1200 SNPs, 858 returned scores of 1–6 by RegulomeDB. Of these 858 SNPs, 97 were predicted to have regulatory functions with RegulomeDB score of < 3. Notably, only 8 of the 97 predicted regulatory variants were genome-wide significant SNPs (*LIPA*/rs2246833, RegulomeDB score = 1b; *ZC3HC1*/rs11556924, *CYP17A1-CNNM2-NT5C2*/rs12413409, *APOE-APOC1*/rs2075650 and *UBE2Z*/rs46522, each with a RegulomeDB score = 1f; *ZNF259-APOA5-APOA1*/rs964184, *SMG6*/rs2281727 and *COL4A1-COL4A2*/rs4773144, each with a RegulomeDB score = 2b). The remainder 89 functional SNPs were in linkage disequilibrium with GWAS SNPs. This study supports the hypothesis that some of the non-coding variants are true signals via regulation of gene expression at transcription level. Our study indicates that RegulomeDB is a useful database to examine the putative functions of large number of genetic variants and it may help to identify a true association among multiple tagged SNPs in a complex disease, such as CAD.

**Database URLs:** <http://www.regulomedb.org/>; <https://www.broadinstitute.org/mpg/snap/>

## Background

Most human DNA sequence is non-coding (98%) and hence only small portion (2%) of human genome encodes proteins (1). Although the pathogenesis of monogenic disorders is largely explained, it has been difficult to determine the underlying mechanisms of complex disorders like coronary artery disease (CAD). Before the development of genome-wide association studies (GWAS), only the *APOE\*4* allele showed consistent association with the risk of CAD across many populations (2–5).

The hypothesis-free GWAS approach was designed with the assumption that common DNA variants explain the bulk of the variation in common diseases (6). About 90% of GWAS-implicated variants, exert only minimal to modest effect sizes on disease phenotypes, and they are present in non-coding rather than coding regions (7). Highly sensitive molecular and computational techniques have identified different regulatory elements (DNase hypersensitive regions, sequences affecting the binding of transcription factors and promoters or enhancers) in intergenic regions (8). Common variants located in one of these regulatory elements may affect gene expression. To predict the role of these variants in gene regulation and to differentiate between physically tagged and functional single nucleotides polymorphism (SNPs), many databases have been created (9). RegulomeDB is one of such databases that describes the role of these variants in transcriptional regulation.

Similar to many other complex diseases, GWAS have identified hundreds of risk variants associated with CAD that need to be analyzed for their functional role in gene expression (10). Recently, we have used SNAP Webportal and Regulome DB to identify potential regulatory function of variants in associated risk loci for Alzheimer's disease (11). In this study, we have applied the same approach to identify the regulatory nature of GWAS-implicated variants with CAD and those that are in linkage disequilibrium (LD) with these variants.

### Objective

The objective of our study was to assess the GWAS-implicated CAD variants and those variants in LD with GWAS variants for their potential regulatory effects on gene transcription using bioinformatics tools.

## Materials and methods

### SNPs selection

A total of 58 SNPs within 54 CAD loci was selected, including 52 with accepted genome-wide significant

**Table 1.** Number of SNPs in LD for all published GWAS SNPs for HapMap3 and 1000 genomes populations at tested  $r^2$  threshold

|                          | LD              |      |      |
|--------------------------|-----------------|------|------|
|                          | $r^2$ threshold | 0.80 | 0.90 |
| 1000 Genomes             | 1176            | 928  | 480  |
| Hap Map3                 | 210             | 157  | 74   |
| Total (overlaps removed) | 1200            | 934  | 485  |

threshold ( $P < 5 \times 10^{-8}$ ) and 6 with suggestive associations ( $P > 5 \times 10^{-8}$ ) identified in two GWAS (12, 13). Detailed information on the selected 58 SNPs is provided in [Supplementary Table S1](#).

### Linkage disequilibrium

For the LD assessment of the selected 58 SNPs, we used SNAP web portal (<https://www.broadinstitute.org/mpg/snap/>, accessed 13 July 2016) (14) ([Supplementary Table S2](#)). SNAP contains data from the Northern European from Utah (CEU) population derived from the 1000 Genomes Pilot Project 1 and three different releases of the International-Hap Map Project. We used data from both the 1000 Genomes Project and HapMap 3 (release 2) to identify SNPs in strong LD ( $r^2 \geq 0.80$ ) with our SNPs of interest. We did not select an array bound search, and query SNPs were included in the output. We performed the search at three thresholds— $r^2 \geq 0.80$ ,  $r^2 \geq 0.90$  and  $r^2 \geq 1.0$ —for both SNP datasets and identified a total of 1,200 SNPs in LD with the 58 published GWAS SNPs, including the GWAS SNPs themselves. As shown in [Table 1](#), the number of proxy SNPs decreased with the increased level of  $r^2$ .

### Functional assessment of CAD-associated SNPs

We used RegulomeDB to identify potentially functional SNPs among the 1200 SNPs of interest. Regulome DB is a database that scores SNPs functionality based upon experimental data, such as its existence in a DNase hypersensitive site or transcription factor binding site. These regions have been characterized biochemically, and data are drawn from published literature, Gene Expression Omnibus and ENCODE project that include a total of 962 experimental datasets, covering over 100 tissues and cell lines and representing nearly 60 million annotations. The output data can be mapped to Human genome version 19. It is a user friendly and freely accessible database (<http://www.regulomedb.org/> accessed 17 July 2016) (15). The functional Grades 1–6 of RegulomeDB are given in [Table 2](#). SNPs

**Table 2.** RegulomeDB category summaries (15)

| Category                                                                  | Description                                                          |
|---------------------------------------------------------------------------|----------------------------------------------------------------------|
| <b>Likely to affect binding and linked to expression of a gene target</b> |                                                                      |
| 1b                                                                        | eQTL + TF binding + any motif + DNase footprint + DNase peak         |
| 1c                                                                        | eQTL + TF binding + matched TF motif + DNase peak                    |
| 1d                                                                        | eQTL + TF binding + any motif + DNase peak                           |
| 1e                                                                        | eQTL + TF binding + matched TF motif                                 |
| 1f                                                                        | eQTL + TF binding/DNase peak                                         |
| <b>Likely to affect binding</b>                                           |                                                                      |
| 2a                                                                        | TF binding + matched TF motif + matched DNase footprint + DNase peak |
| 2b                                                                        | TF binding + any motif + DNase footprint + DNase peak                |
| 2c                                                                        | TF binding + matched TF motif + DNase peak                           |
| <b>Less likely to affect binding</b>                                      |                                                                      |
| 3a                                                                        | TF binding + any motif + DNase peak                                  |
| 3b                                                                        | TF binding + matched TF motif                                        |
| <b>Minimal binding evidence</b>                                           |                                                                      |
| 4                                                                         | TF binding + DNase peak                                              |
| 5                                                                         | TF binding or DNase peak                                             |
| 6                                                                         | Motif hit                                                            |

showing the strongest evidence of being regulatory (affecting the binding of transcription factor) are given a score of 1 and SNPs demonstrating the least evidence of being functional are given a score of 6.

## Results

Among the 1200 SNPs evaluated with RegulomeDB, 342 had no data (Supplementary Table S3). Of the 858 SNPs for which RegulomeDB provided a score, 97 had a score of <3 (likely to affect the binding) and among these only 8 SNPs were genome-wide significant, including *LIPA*/rs2246833 (RegulomeDB score = 1b; eQTL in monocytes), *ZC3HC1*/rs11556924 (RegulomeDB score = 1f; eQTL in monocytes), *CYP17A1-CNNM2-NT5C2*/rs12413409 (RegulomeDB score = 1f; eQTL in monocytes and lymphoblasts), *APOE-APOC1*/rs2075650, and *UBE2Z*/rs46522 (RegulomeDB score = 1f; eQTL in monocytes), *ZNF259-APOA5-APOA1*/rs964184, *UBE2Z*/rs46522, *SMG6*/rs2281727, *COL4A1-COL4A2*/rs4773144 (RegulomeDB score = 2b; eQTLs in monocytes and lymphoblasts). A flow chart summarizes these results (Figure 1). The remaining 89 SNPs with RegulomeDB scores < 3 were not identified in GWAS but they were in LD ( $r^2 \geq 0.80$ ) with the 29 GWAS reported SNPs. A summary of the regulatory SNPs in LD with GWAS SNPs is provided in Table 3.

Overall, we had 97 functional SNPs (RegulomeDB < 3). Eight of these were GWAS SNPs, and the remaining 89 were in LD ( $r^2 \geq 0.80$ ) with the GWAS SNPs.

Three variants, *FES*/rs1894401, *LIPA*/rs2246833 and *VAMP8*/rs1009, were strongly predicted to be functional

with score of 1b. *FES*/rs1894401 is an intronic SNP that is an eQTL for *FES* in thyroid and transformed lymphoblasts, is present in the binding motif of Pax5, and affects the binding of eleven transcription factors. *LIPA*/rs2246833 (RegulomeDB score = 1b), located in Intron 6 of *LIPA*, in the DNA motif of EWSRCFL11, is a GWAS reported SNP along with 4 other functional SNPs (of 12 tested) in this region and it affects the binding of CTCF. It is an eQTL in the whole blood. *VAMP5-VAMP8-GGCX*/rs1009 is in exon 3 of *VAMP8* and affects the binding of CTCF and HSF1. rs1009 of *VAMP8* is an eQTL in lymphoblasts, skeletal muscles, adipose tissue and thyroid. Of 42 SNPs analyzed in this locus, we found 8 other SNPs with RegulomeDB score < 3 (Table 3).

There were 33 functional SNPs within 15 GWAS identified CAD loci: *ABO* (1 of 10 assessed), *ADAMTS7* (1 of 15 assessed), *CXCL12* (2 of 36 assessed), *HHIPL1* (3 of 17 assessed), *KCNE2* (2 of 18 assessed), *KIAA1462* (1 of 9 assessed), *MIA3* (1 of 27 assessed), *PPAP2B* (2 of 22 assessed), *SORT1* (3 of 9 assessed), *WDR12* (5 of 214 assessed), *IL6R* (3 of 14 assessed), *LPL* (2 of 6 assessed), *PLG* (2 of 41 assessed), *SLC22A4-SLC22A5* (1 of 2 assessed) and *TRIB1* (4 of 16 assessed).

Of 97 SNPs with RegulomeDB score < 3, 25 were in the *CYP17A1-CNNM2-NT5C2* region, and one of them was a GWAS reported SNP (rs12413409). The regional LD plot of this SNP is given in Supplementary Figure S1. rs9633712 (RegulomeDB score = 1e) is located in Intron 3 of *NT5C2* and is an eQTL for *USMG5* in monocytes. This SNP was also found in the motifs of the following transcription factors: PU1, ELF1, Sfpil, PU.1 and c-Ets-1.

**Table 3.** Functional SNPs (RegluomeDB Score < 3) in LD ( $r^2 \geq 0.80$ ) with published GWAS SNPs

| GWAS SNPs                              | Functional proxy SNPs                             | Regulome DB score |
|----------------------------------------|---------------------------------------------------|-------------------|
| <i>LIPA</i> /rs2246833                 | <i>LIPA</i> /rs1332327                            | 2b                |
|                                        | <i>LIPA</i> /rs1332328                            | 2b                |
|                                        | <i>LIPA</i> /rs1412444                            | 1d                |
|                                        | <b><i>LIPA</i>/rs2246833<sup>a</sup></b>          | <b>1b</b>         |
|                                        | <i>LIPA</i> /rs2250644                            | 2b                |
| <i>ZC3HC1</i> /rs11556924              | <b><i>ZC3HC1</i>/rs11556924<sup>a</sup></b>       | <b>1f</b>         |
| <i>CYP17A1-CNNM2-NT5C2</i> /rs12413409 | <i>AS3MT</i> /rs11191454                          | 1f                |
|                                        | <i>BORCS7-ASMT</i> /rs4409766                     | 1f                |
|                                        | <i>CNNM2</i> /rs10883808                          | 1f                |
|                                        | <i>MAT2A</i> /rs1446668                           | 2a                |
|                                        | <i>NT5C2</i> /rs10883832                          | 1f                |
|                                        | <i>CNNM2</i> /rs11191479                          | 1f                |
|                                        | <i>NT5C2</i> /rs11191557                          | 1f                |
|                                        | <i>CNNM2</i> /rs11191499                          | 1f                |
|                                        | <i>NT5C2</i> /rs11191558                          | 1f                |
|                                        | <i>CNNM2</i> /rs11191514                          | 1f                |
|                                        | <i>NT5C2</i> /rs11191580                          | 1f                |
|                                        | <i>CNNM2</i> /rs11191515                          | 1f                |
|                                        | <i>NT5C2</i> /rs11191582                          | 1f                |
|                                        | <i>CNNM2</i> /rs12221064                          | 2b                |
|                                        | <i>NT5C2</i> /rs12412038                          | 1f                |
|                                        | <i>CNNM2</i> /rs12411886                          | 1f                |
|                                        | <i>NT5C2</i> /rs12413046                          | 1f                |
|                                        | <b><i>CNNM2</i>/rs12413409<sup>a</sup></b>        | <b>1f</b>         |
|                                        | <i>NT5C2</i> /rs9633712                           | 1e                |
|                                        | <i>CNNM2</i> /rs17115213                          | 1f                |
|                                        | <i>NT5C2</i> /rs11191548                          | 1f                |
|                                        | <i>CNNM2</i> /rs2297787                           | 2a                |
|                                        | <i>CNNM2</i> /rs3781285                           | 1f                |
| <i>CNNM2</i> /rs943037                 | 1f                                                |                   |
| <i>CNNM2</i> /rs12219901               | 2b                                                |                   |
| <i>APOE-APOC1/TOMM40</i> /rs2075650    | <b><i>APOE-APOC1</i>/rs2075650<sup>a</sup></b>    | <b>1f</b>         |
| <i>UBE2Z</i> /rs46522                  | <i>GIP</i> /rs2291725                             | 1f                |
|                                        | <i>GIP</i> /rs4794004                             | 1d                |
|                                        | <i>SNF8</i> /rs1994970                            | 1f                |
|                                        | <i>SNF8</i> /rs4793992                            | 1f                |
|                                        | <i>UBE2Z</i> /rs12601672                          | 2b                |
|                                        | <i>UBE2Z</i> /rs15563                             | 1f                |
|                                        | <i>UBE2Z</i> /rs3744608                           | 2a                |
|                                        | <i>UBE2Z</i> /rs3848460                           | 1f                |
|                                        | <b><i>UBE2Z</i>/rs46522<sup>a</sup></b>           | <b>1f</b>         |
|                                        | <i>UBE2Z</i> /rs11079844                          | 1f                |
| <i>ZNF259-APOA5-APOA1</i> /rs964184    | <b><i>ZNF259-APOA5-APOA1</i>/rs964184</b>         | <b>1f</b>         |
| <i>SMG6</i> /rs2281727                 | <b><i>SMG6</i>/rs2281727<sup>a</sup></b>          | <b>2b</b>         |
|                                        | <i>SMG6</i> /rs7217687                            | 2b                |
|                                        | <i>SMG6</i> /rs9908888                            | 2b                |
| <i>COL4A1-COL4A2</i> /rs4773144        | <b><i>COL4A1-COL4A2</i>/rs4773144<sup>a</sup></b> | <b>2b</b>         |
| <i>ABO</i> /rs579459                   | <i>ABO</i> /rs649129                              | 2b                |
| <i>ADMTS7</i> /rs7173743               | <i>LOC105370915</i> /rs5029904                    | 2b                |
|                                        | <i>PHACTR1</i> /rs4773143                         | 2b                |
| <i>CXCL12</i> /rs501120                | <i>CXCL12</i> /rs518594                           | 2b                |
|                                        | <i>CXCL12</i> /rs1746052                          | 2b                |

(Continued)

**Table 3.** Continued

| GWAS SNPs                         | Functional proxy SNPs          | Regulome DB score |
|-----------------------------------|--------------------------------|-------------------|
| <i>FURIN-FES/rs17514846</i>       | <i>FES/rs1894401</i>           | 1b                |
| <i>HHIPL1/rs2895811</i>           | <i>HHIPL1/rs28391527</i>       | 2b                |
|                                   | <i>HHIPL1/rs4624107</i>        | 2b                |
|                                   | <i>HHIPL1/rs7145262</i>        | 2b                |
| <i>IL6R/rs4845625</i>             | <i>IL6R/rs7549250</i>          | 2b                |
|                                   | <i>IL6R/rs7549338</i>          | 2b                |
|                                   | <i>IL6R/rs7553796</i>          | 2b                |
| <i>KCNE2/rs9982601</i>            | <i>KCNE2/rs28591415</i>        | 2b                |
| <i>KIAA1462/rs2505083</i>         | <i>KIAA1462/rs3739998</i>      | 2b                |
| <i>LPL/rs264</i>                  | <i>LPL/rs271</i>               | 1f                |
|                                   | <i>LPL/rs3779788</i>           | 2b                |
| <i>MIA3/rs17465637</i>            | <i>MIA3/rs17163301</i>         | 2b                |
| <i>PLG/rs4252120</i>              | <i>PLG/rs4252126</i>           | 1f                |
|                                   | <i>PLG/rs4252135</i>           | 1f                |
| <i>PPAP2B/rs17114036</i>          | <i>LOC101929929/rs72664304</i> | 2a                |
|                                   | <i>PLPP3/rs4634932</i>         | 1f                |
| <i>SLC22A4-SLC22A5/rs273909</i>   | <i>SLC22A5/rs17689550</i>      | 1f                |
|                                   | <i>SMG6/rs7217687</i>          | 2b                |
|                                   | <i>SMG6/rs9908888</i>          | 2b                |
| <i>SORT1/rs602633</i>             | <i>CELSR2/rs12740374</i>       | 2b                |
|                                   | <i>CELSR2/rs629301</i>         | 1f                |
|                                   | <i>CELSR2/rs646776</i>         | 1f                |
| <i>TRIB1/rs2954029</i>            | <i>LOC105375745/rs2980853</i>  | 2b                |
|                                   | <i>LOC105375745/rs2001844</i>  | 2b                |
|                                   | <i>LOC105375745/rs6982636</i>  | 2b                |
|                                   | <i>TRIB1/rs2980856</i>         | 2b                |
| <i>VAMP5-VAMP8-GGCX/rs1561198</i> | <i>GGCX/rs6738645</i>          | 1f                |
|                                   | <i>GGCX/rs10187424</i>         | 1f                |
|                                   | <i>VAMP8/rs1009</i>            | 1b                |
|                                   | <i>GGCX/rs6547621</i>          | 1f                |
|                                   | <i>VAMP8/rs1348818</i>         | 1f                |
|                                   | <i>GGCX/rs2886722</i>          | 1f                |
|                                   | <i>VAMP8/rs3770098</i>         | 1f                |
|                                   | <i>VAMP8/rs6757263</i>         | 1f                |
| <i>WDR12/rs6725887</i>            | <i>ICA1L/rs72934715</i>        | 2b                |
|                                   | <i>NBEAL1/rs2351524</i>        | 1f                |
|                                   | <i>WDR12/rs72936852</i>        | 2b                |
|                                   | <i>NBEAL1/rs4675310</i>        | 1f                |
|                                   | <i>NBEAL1/rs72934512</i>       | 2b                |
| <i>REST-NOA1/rs17087335</i>       | <i>REST/rs2227901</i>          | 1f                |
|                                   | <i>REST-NOA1/rs7687767</i>     | 1d                |
| <i>SWAP70/rs10840293</i>          | <i>SWAP70/rs93138</i>          | 1f                |
|                                   | <i>SWAP70/rs360136</i>         | 1f                |
| <i>SMAD3/rs56062135</i>           | <i>SMAD3/rs17293632</i>        | 2a                |
|                                   | <i>SMAD3/rs1866316</i>         | 2b                |
|                                   | <i>MTERF1/rs8032739</i>        | 2b                |
| <i>CDKN2BAS1/rs1333049</i>        | <i>CDKN2BAS1/rs4977574</i>     | 2c                |

<sup>a</sup>GWAS significant SNPs with functional evidence (RegulomeDB score < 3) are bolded.

It appears to affect the binding of SPI1. Twenty SNPs returned a score of 1f (likely to affect the binding), and 18 of them were in intronic regions. *NT5C2/rs11191558* lies in HOXC series of DNA motifs, and *CNNM2/rs3781285* lies between NF-kappaB and P50:50. *NT5C2/rs2297787*

returned a score of 2a, affecting the binding motifs of FOXI1, HNF3-alpha and FOXP1 and the binding of FOXA1. SNP *rs12412038* is located in Intron 10 of *NT5C2* and is in the binding motif of Irx. The remaining two SNPs, *rs12219901* and *rs12221064*, lie in the



*CNNM2-NT5C2* intergenic region and upstream of *CNNM2*, respectively. They are located *in* DNA motifs of SRF and MAZR and affect the binding of POLRA2 and CTCF/ETS. Interestingly, rs943037 resides in exon 7 of *CNNM2*. Nineteen of the 25 SNPs in the region of *CYP17A1-CNNM2-NT5C2* are eQTLs for *USMG5* (Table 4).

One SNP rs2075650 lies in Intron 2 of *ApoEapoC1/TOMM40* with a RegulomeDB score of 1f. It is located in RREB1 DNA motif and is an eQTL for *TOMM40* (Table 4).

In total 3 of 107 SMG6 associated SNPs, rs2281727, rs7217687 and rs9908888 had a score of 2b and they affect the binding of EP300. rs2281727 is a genome-wide significant SNP located in Intron 9 of *SMG6*. It is in binding motifs of SRY, Srf and Zfp105 and affects the binding of CREBBP, EP300, STAT3, TRIM28, MYC and RBBP5 (Table 4).

The *UBE2Z* region had 10 functional SNPs, including a GWAS reported SNP, *UBE2Z/rs46522* (RegulomeDB score of 1f). The SNP with the most evidence of regulatory function in this locus is rs4794004 with a score of 1d. It is in DNA motif of Gata5 that alters the expression of *UBE2Z* and *ATP5G1* and affects the binding of NR3C1, IN3AK20, CREB1, TAF12, CTCF, POLR2A, USF1, FOXA1, FOXA2 and RBBP5. The other 5 SNPs in this region have a score of 1f. The remaining two regulatory SNPs, rs3744608 and rs12601672, have scores of 2a and 2b, respectively. rs3744608 is located in Intron 3 of *UBE2Z* and it affects the binding of large number of transcription factors (Table 4).

*COL4A1-COL4A2/rs473144* is a GWAS reported SNP, achieving a RegulomeDB score of 2b. This SNP lies in Intron 3 of *COL4A2* between STST3:STAT3 DNA motif and affects the binding of POLR2A and EZH2 (Table 4). *ZNF259-APOA5-APOA1/rs964184* is a GWAS significant SNP with a score of 1f and is an eQTL for TAGLN. This SNP is located downstream of this gene region and is present in FOXJ2 DNA motif. Another GWAS significant SNP, *ZC3HC1/rs11556924* is an exonic variant and the only functional SNP (score = 1f) in this locus; it is also an eQTL for *ZC3HC1* (Table 4).

*REST-NOA1/rs17087335* is in LD with two functional SNPs (rs2227901 and rs7687767 with RegulomeDB scores of 1f and 1d, respectively). rs768776 lies in DNA motif of Sox8 and affects the binding of FOXA1. *SWAP70* has two functional SNPs, rs93138 and rs360136, each with a RegulomeDB score of 1f. *SWAP70/rs93138* is an eQTL as evidenced in monocytes.

*SMAD3* has three functional SNPs, *SMAD3/rs17293632* and *SMAD3/rs1866316* and *MTERF1/rs8032739* with RegulomeDB scores of 2a, 2a and 2b, respectively. Both are in

LD with a lead GWAS SNP (*SMAD3/rs56062135*). *CDKN2BAS1/rs1333049* has one functional SNP (rs4977574) only with RegulomeDB score of 3c. It is a part of a gene cluster on chromosome 9p21 and it maps to Intron 16 of cyclin dependent kinase, an important regulator of cell cycle.

## Discussion

Following the sequencing of human genome, a large number of SNPs have been identified that affect disease phenotypes, but their exact roles remain unclear (16). One possible explanation is that some variation affects disease expression at the transcriptional level other than at the protein level. For example, a base pair change in a transcription factor binding site may affect the binding affinity of transcription factors that consequently may alter the transcription of the related genes. These effects are indirect and may seem subtle, but their interactions with other genetic or environmental factors may result in the pathogenesis of common diseases.

Like other complex disorders, a large number of CAD associated risk variants have been discovered by multiple GWAS (12, 13, 17). ENCODE provides information regarding the functionality of human genome (18). This data requires careful interpretation and helps to define the biological function of previously termed ‘junk DNA’. Using bioinformatics tools, we may generate new hypotheses about the gene regulation of complex disorders. In this study, we have used two bioinformatics tools, SNAP and RegulomeDB, in order to identify the putative roles of CAD-associated SNPs.

We examined a total 1,200 SNPs in 54 loci implicated by GWAS, including 58 genome-wide significant SNPs. Ninety-seven SNPs were predicted to have regulatory functions with a RegulomeDB score of <3, but only 8 of them were genome-wide significant. Interestingly, all 8 genome-wide significant SNPs with suggested regulatory function are located either in intronic or intergenic regions, suggesting that these are true associations that regulate gene expression at the transcriptional level.

Among these eight GWAS reported functional SNPs, the SNP with the top RegulomeDB score was *LIPA/rs2246833* (Regulome DB score = 1b). This variant is located in Intron 6 of lipase A (*LIPA*) and is an eQTL for the same gene which catalyzes intracellular triglyceride and hydrolyses cholesterol ester (19).

*ZC3HC1/rs11556924* is a GWAS significant CAD associated SNP that returned a score of 1f. rs11556924 is a coding SNP located in the *ZC3HC1* gene region encoding NIPA (Nuclear Interaction Partner of ALK) protein. This polymorphism is responsible for arginine-histidine amino acid alteration at position 363 (R363H). The SNP has been

**Table 4.** Putative functional SNPs and corresponding motifs, eQTL and related transcription factors (Regulome DB score < 3)

| Coordinate 0-based | SNP ID    | RegulomeDB score | Gene/Locus         | Position               | eQTL               | Motif                                                                                         | Protein-binding                                                                                       |
|--------------------|-----------|------------------|--------------------|------------------------|--------------------|-----------------------------------------------------------------------------------------------|-------------------------------------------------------------------------------------------------------|
| chr15:91429041     | rs1894401 | 1b               | <i>FES</i>         | <i>Intron 2</i>        | FES                | Pax5                                                                                          | SPI1<br>USF1<br>POLR2A<br>GABPA<br>BHLHE40<br>CEBPB<br>CTCF<br>MAX<br>RFX5<br>RUNX3<br>STAT5A<br>CTCF |
| chr10:91005853     | rs2246833 | 1b               | <i>LIPA</i>        | <i>Intron 6</i>        | LIPA               | EWSR-FLI1<br>zNF143                                                                           | CTCF<br>HSF1                                                                                          |
| chr2:85808736      | rs1009    | 1b               | <i>VAMP8</i>       | <i>Exon 3</i>          | VAMP8<br>LOC388969 |                                                                                               | CTCF<br>NR3C1                                                                                         |
| chr17:47038470     | rs4794004 | 1d               | <i>GIP</i>         | <i>Intron 4</i>        | ATP5G1<br>UBE2Z    | Gata5                                                                                         | IN3AK20<br>CREB1<br>TAF1<br>TCF12<br>CTCF<br>POLR2A<br>USF1<br>FOXA1<br>FOXA2<br>RBBP5                |
| chr10:91002926     | rs1412444 | 1d               | <i>LIPA</i>        | <i>Intron3</i>         | LIPA               | SAP1a<br>ELK1<br>ELK3<br>ELK4<br>MECP2<br>ERF<br>ERG<br>ETS1<br>ETV1<br>ETV2<br>ETV3<br>Gabpa | ATF2<br>FOXM1<br>SP1<br>SPI1<br>MTA3<br>RUNX3                                                         |
| chr10:104873760    | rs9633712 | 1e               | <i>NT5C2</i>       | <i>Intron 3</i>        | UMG5               | PU1<br>ELF-1<br>Sfpil<br>PU.1<br>c-Ets-1                                                      | SP11                                                                                                  |
| chr11:116648916    | rs964184  | 1f               | <i>ZPR1</i>        | <i>Downstream ZRP1</i> | TAGLN              | FOXJ2                                                                                         |                                                                                                       |
| chr1:109818529     | rs646776  | 1f               | <i>CELSR2</i>      | <i>Upstream CELSR2</i> | PSMA5              |                                                                                               | CTCF<br>HEY1<br>REST<br>POLR2A<br>ZBTB7A                                                              |
| chr10:104616662    | rs4409766 | 1f               | <i>BORCS7-ASMT</i> | <i>Intron 1</i>        | C10orf77<br>USMG5  | Tcf3                                                                                          | TAF7<br>BACH1<br>MAFF                                                                                 |

(Continued)

Table 4. Continued

| Coordinate 0-based | SNP ID     | RegulomeDB score | Gene/Locus               | Position                | eQTL            | Motif                                                             | Protein-binding                                                             |
|--------------------|------------|------------------|--------------------------|-------------------------|-----------------|-------------------------------------------------------------------|-----------------------------------------------------------------------------|
| chr17:47008206     | rs4793992  | 1f               | <i>SNF8</i>              | <i>Intron 7</i>         | ATP5G1<br>UBE2Z |                                                                   | MAFK<br>POLR2A<br>TEAD4                                                     |
| chr6:161152293     | rs4252126  | 1f               | <i>PLG</i>               | <i>Intron 11</i>        | PLG             |                                                                   | CTCF<br>RUNX3<br>TEAD4<br>RAD21                                             |
| chr6:161154231     | rs4252135  | 1f               | <i>PLG</i>               | <i>Intron 12</i>        | PLG             |                                                                   | CTCF<br>FOXA1<br>NFKB1<br>RAD21<br>ZNF263<br>SMC3<br>ZNF143<br>FOXA2        |
| chr10:104846177    | rs11191548 | 1f               | <i>NT5C2 gene region</i> | <i>Downstream NT5C2</i> | USMG5           | TEAD1<br>TEAD3                                                    |                                                                             |
| chr10:104864613    | rs11191557 | 1f               | <i>NT5C2</i>             | <i>Intron 5</i>         | USMG5           |                                                                   |                                                                             |
| chr10:104864677    | rs11191558 | 1f               | <i>NT5C2</i>             | <i>Intron 5</i>         | USMG5           | HOXC13<br>Hoxa13<br>Hoxc13<br>Hoxd12<br>HOXA13<br>HOXD9<br>HOXC11 |                                                                             |
| chr10:104871203    | rs12413046 | 1f               | <i>NT5C2</i>             | <i>Intron 3</i>         | USMG5           |                                                                   | NR3C1<br>TRIM28<br>CTCF<br>ATF2<br>IKZF1<br>TCF7L2<br>ZNF263                |
| chr10:104871278    | rs10883832 | 1f               | <i>NT5C2</i>             | <i>Intron 3</i>         | USMG5           |                                                                   | TRIM28<br>TCF7L2                                                            |
| chr10:104913652    | rs11191582 | 1f               | <i>NT5C2</i>             | <i>Intron 2</i>         | USMG5           |                                                                   | EP300<br>NFIC<br>TCF12<br>TEAD4<br>STAT1<br>ARID3A<br>EP300<br>JUN<br>RCOR1 |
| chr10:104906210    | rs11191580 | 1f               | <i>NT5C2</i>             | <i>Intron 2</i>         | USMG5           |                                                                   | TRIM28<br>SETDB1<br>GATA1<br>GTF2F1<br>CEBPB<br>FOS<br>JUND<br>ZNF263       |
| chr10:104856161    | rs12412038 | 1f               | <i>NT5C2</i>             | <i>Intron 10</i>        | USMG5           | Irx-3<br>Irx-2                                                    |                                                                             |

(Continued)



Table 4. Continued

| Coordinate 0-based | SNP ID     | RegulomeDB score | Gene/Locus | Position              | eQTL                       | Motif                                                     | Protein-binding                                                                                                             |
|--------------------|------------|------------------|------------|-----------------------|----------------------------|-----------------------------------------------------------|-----------------------------------------------------------------------------------------------------------------------------|
| chr2:85807081      | rs1348818  | 1f               | VAMP8      | <i>Intron 2</i>       | GGCX                       | Irx-4<br>Irx-6<br>HMGYI<br>Mtf1<br>Srf<br>Zfp105<br>HMGYI | EBF1,                                                                                                                       |
| chr2:85805366      | rs3770098  | 1f               | VAMP8      | <i>Intron1</i>        | VAMP8<br>LOC388969         |                                                           | POLR2A<br>BHLHE40<br>E2F6<br>KDM5B<br>MAX<br>MXI1<br>MYC<br>NFIC<br>WRNIP1<br>SP1<br>EP300<br>NFIC                          |
| chr2:85803541      | rs6757263  | 1f               | VAMP8      | <i>Upstream VAMP8</i> | GGCX<br>VAMP8<br>LOC388969 |                                                           | NFKB<br>NFYB<br>RUNX3                                                                                                       |
| chr17:46988596     | rs46522    | 1f               | UBE2Z      | <i>Intron 2</i>       | ATP5G1<br>UBE2Z            |                                                           |                                                                                                                             |
| chr19:45395618     | rs2075650  | 1f               | TOMM40     | <i>Intron 2</i>       | TOMM40                     | RREB1                                                     |                                                                                                                             |
| chr1:56996190      | rs4634932  | 1f               | PLPP3      | <i>Intron 2</i>       | PPAP2B                     |                                                           | POLR2A                                                                                                                      |
| chr2:203880833     | rs4675310  | 1f               | NBEAL1     | <i>Intron 1</i>       | ALS2CR13                   |                                                           |                                                                                                                             |
| chr10:104681142    | rs17115213 | 1f               | CNNM2      | <i>Intron 1</i>       | USMG5                      |                                                           |                                                                                                                             |
| chr10:104721125    | rs10883808 | 1f               | CNNM2      | <i>Intron 1</i>       | USMG5                      |                                                           |                                                                                                                             |
| chr10:104723619    | rs11191479 | 1f               | CNNM2      | <i>Intron 1</i>       | USMG5                      |                                                           | GATA1<br>TAL1<br>CEBPB                                                                                                      |
| chr10:104773363    | rs11191514 | 1f               | CNNM2      | <i>Intron 1</i>       | USMG5                      |                                                           | PAX5                                                                                                                        |
| chr10:104776526    | rs11191515 | 1f               | CNNM2      | <i>Intron 1</i>       | USMG5                      |                                                           |                                                                                                                             |
| chr10:104825664    | rs3781285  | 1f               | CNNM2      | <i>Intron 4</i>       | USMG5                      | NF-kappaB<br>P50:50                                       | IKZF1                                                                                                                       |
| chr10:104835918    | rs943037   | 1f               | CNNM2      | <i>Exon 7</i>         | USMG5                      | TBX20<br>Foxj1                                            |                                                                                                                             |
| chr8:19813701      | rs271      | 1f               | LPL        | <i>Intron 6</i>       | LPL                        |                                                           |                                                                                                                             |
| chr17:47039131     | rs2291725  | 1f               | GIP        | <i>Exon 4</i>         | GIP                        |                                                           | GATA2<br>TCF4<br>FOSL2<br>EGR1<br>ELF1<br>FOS<br>NR3C1<br>EP300<br>RXRA<br>CHD2<br>JUND<br>POLR2A<br>RAD21<br>FOSL1<br>REST |
| chr2:203880991     | rs2351524  | 1f               | NBEAL1     | <i>5' UTR</i>         | ALS2CR13                   |                                                           |                                                                                                                             |

(Continued)

Table 4. Continued

| Coordinate 0-based | SNP ID     | RegulomeDB score | Gene/Locus        | Position        | eQTL              | Motif                                                                                                           | Protein-binding                                                                                                         |
|--------------------|------------|------------------|-------------------|-----------------|-------------------|-----------------------------------------------------------------------------------------------------------------|-------------------------------------------------------------------------------------------------------------------------|
| chr1:109818305     | rs629301   | 1f               | <i>CELSR2</i>     | 3' UTR          | PSRC1             |                                                                                                                 | CTCF<br>POLR2A                                                                                                          |
| chr2:85774675      | rs6547621  | 1f               |                   | 3' UTR          | GGCX              |                                                                                                                 | ELK4<br>POLR2A                                                                                                          |
| chr10:104660003    | rs11191454 | 1f               | <i>AS3MT</i>      | <i>Intron10</i> | USMG5             |                                                                                                                 |                                                                                                                         |
| chr10:104685298    | rs12411886 | 1f               | <i>CNNM2</i>      | <i>Intron1</i>  | USMG5             | Zec                                                                                                             |                                                                                                                         |
| chr10:104719095    | rs12413409 | 1f               | <i>CNNM2</i>      | <i>Intron1</i>  | USMG5             |                                                                                                                 | POLR3A                                                                                                                  |
| chr10:104764270    | rs11191499 | 1f               | <i>CNNM2</i>      | <i>Intron1</i>  | USMG5             |                                                                                                                 |                                                                                                                         |
| chr17:47014126     | rs1994970  | 1f               | <i>SNF8</i>       | <i>Intron4</i>  | ATP5G1<br>UBE2Z   | TFII-I                                                                                                          |                                                                                                                         |
| chr2:85742296      | rs2886722  | 1f               | <i>Pseudogene</i> |                 | LOC388969         |                                                                                                                 | TCF7L2                                                                                                                  |
| chr2:85783127      | rs6738645  | 1f               | <i>GGCX</i>       | <i>Intron5</i>  |                   | Evi-1                                                                                                           | POLR2A                                                                                                                  |
| chr2:85794296      | rs10187424 | 1f               | <i>Pseudogene</i> |                 | GGCX<br>LOC388969 |                                                                                                                 |                                                                                                                         |
| chr5:131723064     | rs17689550 | 1f               |                   |                 | RAPGEF6           |                                                                                                                 |                                                                                                                         |
| chr7:129663495     | rs11556924 | 1f               | <i>ZC3HC1</i>     | <i>Exon8</i>    | KIAA0265          |                                                                                                                 |                                                                                                                         |
| chr17:4702833      | rs11079844 | 1f               | <i>Pseudogene</i> |                 | ATP5G1            |                                                                                                                 |                                                                                                                         |
| chr17:47005192     | rs15563    | 1f               | <i>UBE2Z</i>      | <i>Exon7</i>    | ATP5G1            | PRDM1                                                                                                           |                                                                                                                         |
| chr17:47047113     | rs3848460  | 1f               | <i>UBE2Z</i>      |                 | ATP5G1            |                                                                                                                 | CEBPB                                                                                                                   |
| chr10:104680136    | rs2297787  | 2a               | <i>CNNM2</i>      | <i>Intron 1</i> |                   | Freac-7<br>HFH3(FOXI1)<br>HNF3alpha<br>FOXP1<br>Elf3<br>Foxl1<br>Srf<br>Tcf3<br>Tcfap2e<br>Zfp105<br>HFH(FOX11) | FOXA1<br>SIN3A<br>ZNF263<br>HNF4G<br>FOXA1                                                                              |
| chr1:56948289      | rs72664304 | 2a               | <i>C8B</i>        | <i>Intron 6</i> |                   | FOXA1<br>Foxa2                                                                                                  | FOXA1<br>FOXA2<br>TCF4<br>SP1<br>HNF4G<br>HNF4A<br>HDAC2<br>JUND<br>EP300                                               |
| chr17:46993232     | rs3744608  | 2a               | <i>UBE2Z</i>      | <i>Intron 3</i> |                   | Zfp740<br>MZF1<br>MAZR<br>SP1<br>SP1:SP3<br>WT1ZNF21<br>Zfp281<br>ZFp740<br>WT1<br>ZNF219<br>ZNF740<br>SP4      | SPI1<br>POLR2A<br>IKZF1<br>MAX<br>TFAP2A<br>TFAP2C<br>SP1<br>CEBPB<br>NR3C1<br>BATF<br>BCL11A<br>MEF2A<br>NFKB1<br>JUND |

(Continued)

Table 4. Continued

| Coordinate 0-based | SNP ID     | RegulomeDB score | Gene/Locus               | Position                                            | eQTL | Motif          | Protein-binding                                                                                                                                                                                                                                                                                                                                            |
|--------------------|------------|------------------|--------------------------|-----------------------------------------------------|------|----------------|------------------------------------------------------------------------------------------------------------------------------------------------------------------------------------------------------------------------------------------------------------------------------------------------------------------------------------------------------------|
|                    |            |                  |                          |                                                     |      |                | EP300<br>STAT3<br>IRF4<br>EBF1<br>FOSL2<br>BATF<br>NR3C1<br>RUNX3<br>MYC<br>STAT3<br>CTCF<br>POLR2A<br>TAF1<br>RFX5<br>RAD21<br>HEY1<br>CDX2<br>HNF4A<br>ZNF263<br>NR3C1<br>CTCF<br>MYC<br>AR<br>MYBL2<br>TEAD4<br>MAZ<br>CHD2<br>SMC3<br>TBP<br>ZNF143<br>CDX2<br>E2F6<br>MAX<br>NR3C1<br>SIN3A<br>YY1<br>REST<br>HMGN3<br>POLR2A<br>EGR1<br>SPI1<br>ELF1 |
| chr2:85764959      | rs1446668  | 2a               | MAT2A                    | <i>nc transcript</i><br><i>Upstream MAT2A</i>       |      | CTCF           | CTCF<br>MYC<br>AR<br>MYBL2<br>TEAD4<br>MAZ<br>CHD2<br>SMC3<br>TBP<br>ZNF143<br>CDX2<br>E2F6<br>MAX<br>NR3C1<br>SIN3A<br>YY1<br>REST<br>HMGN3<br>POLR2A<br>EGR1<br>SPI1<br>ELF1                                                                                                                                                                             |
| chr17:47006492     | rs12601672 | 2b               | UBE2Z                    | <i>Downstream UBE2Z</i>                             |      | Zfx            | CTCF<br>MYC<br>PAX5<br>ZNF143<br>JUND<br>POLR2A<br>TFAP2C<br>MXI1<br>CEBPB<br>NFYA<br>POLR2A                                                                                                                                                                                                                                                               |
| chr10:30316071     | rs3739998  | 2b               | KIAA1462                 | <i>Exon 2</i>                                       |      | RELA           | CTCF<br>MYC<br>PAX5<br>ZNF143<br>JUND<br>POLR2A<br>TFAP2C<br>MXI1<br>CEBPB<br>NFYA<br>POLR2A                                                                                                                                                                                                                                                               |
| chr8:126476378     | rs2980856  | 2b               | <i>TRIB1 gene region</i> | <i>Intergenic region</i><br><i>Downstream TRIB1</i> |      | pax-8<br>Sox17 | CTCF<br>MYC<br>PAX5<br>ZNF143<br>JUND<br>POLR2A<br>TFAP2C<br>MXI1<br>CEBPB<br>NFYA<br>POLR2A                                                                                                                                                                                                                                                               |
| chr9:136154303     | rs649129   | 2b               | <i>ABO gene region</i>   | <i>Intergenic region</i><br><i>Upstream ABO</i>     |      | IRF            | CTCF<br>MYC<br>PAX5<br>ZNF143<br>JUND<br>POLR2A<br>TFAP2C<br>MXI1<br>CEBPB<br>NFYA<br>POLR2A                                                                                                                                                                                                                                                               |

(Continued)

Table 4. Continued

| Coordinate 0-based | SNP ID     | RegulomeDB score | Gene/Locus                   | Position                                                | eQTL | Motif                  | Protein-binding                                                                                                      |
|--------------------|------------|------------------|------------------------------|---------------------------------------------------------|------|------------------------|----------------------------------------------------------------------------------------------------------------------|
|                    |            |                  |                              |                                                         |      |                        | FOS<br>IRF1<br>NFYB<br>PML<br>POLR2A                                                                                 |
| chr10:104840966    | rs12219901 | 2b               | <i>CNNM2</i> gene region     | <i>Intergenic region</i><br><i>Downstream CXCL12</i>    |      | SRF                    |                                                                                                                      |
| chr10:44778545     | rs1746052  | 2b               | <i>CXCL12</i> gene region    | <i>Intergenic region</i><br><i>Downstream CXCL12</i>    |      | GATA1                  | TAL1                                                                                                                 |
| chr21:35593826     | rs28451064 | 2b               | <i>LINC00310</i> gene region | <i>Intergenic region</i><br><i>Downstream LINC00310</i> |      | PPAR                   | SP1<br>FOXA2                                                                                                         |
| chr17:2098271      | rs7217687  | 2b               | <i>SMG6</i>                  | <i>Intron 13</i>                                        | -    | NF-1                   | SIN3A<br>TCF12<br>MAX<br>YY1<br>ZNF263<br>EP300<br>TEAD4                                                             |
| chr13:110960711    | rs4773144  | 2b               | <i>COL4A2</i>                | <i>Intron 3</i>                                         |      | STAT3:STAT3            | POLR2A<br>EZH2                                                                                                       |
| chr14:100116251    | rs28391527 | 2b               | <i>HHIPL1</i>                | <i>Intron 3</i>                                         |      | MyoD<br>SCRT1<br>FIGLA | BHLHE40<br>USF1<br>FOXA1<br>MAX                                                                                      |
| chr1:154404335     | rs7549250  | 2b               | <i>IL6R</i>                  | <i>Intron 3</i>                                         |      | TBX15                  | MXI1<br>FOS<br>JUNB<br>MAX<br>JUND<br>JUN<br>STAT3<br>FOSL1<br>MAFK<br>RCOR1<br>MYC<br>USF2<br>TEAD4<br>RCOR1<br>YY1 |
| chr1:154404379     | rs7549338  | 2b               | <i>IL6R</i>                  | <i>Intron 3</i>                                         |      | GR<br>AR               | FOS<br>JUNB<br>JUND<br>JUN<br>STAT3                                                                                  |
| chr1:154404405     | rs7553796  | 2b               | <i>IL6R</i>                  | <i>Intron 3</i>                                         |      | NF-kappaB,             | FOS<br>JUND<br>JUN<br>STAT3                                                                                          |
| chr14:100127439    | rs4624107  | 2b               | <i>HHIPL1</i>                | <i>Intron 7</i>                                         |      | Pax5                   | JUND                                                                                                                 |
| chr10:91011457     | rs1332328  | 2b               | <i>LIPA</i>                  | <i>Intron 9</i>                                         |      | UF1H3BETA              | CREBBP<br>ZNF263<br>CDX2<br>ELF1                                                                                     |

(Continued)

Table 4. Continued

| Coordinate 0-based | SNP ID     | RegulomeDB score | Gene/Locus   | Position                 | eQTL | Motif                | Protein-binding                                                                        |
|--------------------|------------|------------------|--------------|--------------------------|------|----------------------|----------------------------------------------------------------------------------------|
|                    |            |                  |              |                          |      |                      | ZEB1<br>TBP<br>TFAPC2<br>TBP<br>POLR2A<br>ETS1<br>GABPA<br>HEY1<br>CREBBP              |
| chr17:2117944      | rs2281727  | 2b               | SMG6         | Intron 13                |      | SRY<br>Srf<br>Zfp105 | EP300<br>STAT3<br>TRIM28<br>MYC<br>RBBP5                                               |
| chr8:126479314     | rs6982636  | 2b               | LOC105375745 | Intron1                  |      | MAF                  | SMARCC1<br>RFX3<br>POLR2A<br>GATA2<br>CHD2<br>GTF2F1                                   |
| chr14:100125720    | rs7145262  | 2b               | HHIPL1       | Intron4                  |      | ESR2                 | SMARCC4<br>ZBTB7A<br>SMARB1<br>POLR2A<br>EZH2<br>RAD21<br>BACH1                        |
| chr10:104677125    | rs12221064 | 2b               | CNNM2        | Upstream CNNM2           |      | MAZR,                | CTCF, ETS1<br>ETS1                                                                     |
| chr8:126478349     | rs2980853  | 2b               | LOC105375745 | Upstream<br>LOC105375745 |      | Pit-1,               | RFX3                                                                                   |
| chr15:79152421     | rs5029904  | 2b               | LOC105370915 | Upstream<br>LOC105370915 |      | NeuroD               | USF1<br>POLR2A<br>YY1<br>FOXA1<br>E2F4<br>MAX<br>TAF7<br>TAF1<br>MXI1                  |
| chr8:126478744     | rs2001844  | 2b               | LOC105375745 | Upstream<br>LOC105375745 |      | HSF1                 | RFX3                                                                                   |
| chr10:91011680     | rs1332327  | 2b               | LIPA         | 5' UTR                   |      | AP-4,                | CREBBP<br>CDX2<br>ELF1<br>TBP<br>SPI1<br>NRF1<br>ELF1<br>ETS1<br>GABPA<br>SPI1<br>PAX5 |

(Continued)

Table 4. Continued

| Coordinate 0-based | SNP ID     | RegulomeDB score | Gene/Locus        | Position                     | eQTL | Motif                                                       | Protein-binding                                                                                             |
|--------------------|------------|------------------|-------------------|------------------------------|------|-------------------------------------------------------------|-------------------------------------------------------------------------------------------------------------|
| chr17:2102452      | rs9908888  | 2b               | SMG6              | <i>Intron10</i>              |      | GR<br>AR                                                    | SREBF1<br>CEBPB                                                                                             |
| chr10:91008878     | rs2250644  | 2b               | LIPA              | <i>Intron1</i>               |      | Oct-1<br>XBP-1<br>MAfb<br>Mafk<br>MAFB<br>MAFK<br>NRL       | RUNX3                                                                                                       |
| chr1:109817589     | rs12740374 | 2b               | CELSR2            | <i>Exon34</i>                |      | HNF1<br>HNF1A<br>DUXA                                       | EBF1                                                                                                        |
| chr1:222794090     | rs17163301 | 2b               | MIA3              | <i>Intron1</i>               |      | HNF1<br>HNF1A<br>HNF1B<br>DUXA                              | EBF1                                                                                                        |
| chr21:35644028     | rs28591415 | 2b               | <i>pseudogene</i> |                              |      | PPAR                                                        | EP300<br>FOXA1<br>HDAC2<br>NFIC<br>SP1                                                                      |
| chr2:203713279     | rs72934715 | 2b               | ICA1L             | <i>Intron2</i>               |      | HMG1Y                                                       | ATF2<br>NFIC<br>EBF1<br>EP300<br>NFKB1<br>PAX5                                                              |
| chr2:203775474     | rs72936852 | 2b               | WDR12             | <i>Intron1</i>               |      | AR                                                          | MAFF                                                                                                        |
| chr2:203926270     | rs72934512 | 2b               | NBEAL1            | <i>Intron6</i>               |      | TEAD1<br>TEAD3                                              | TEAD4                                                                                                       |
| chr8:19803092      | rs3779788  | 2b               | LPL               | <i>Intron1</i>               |      | TGIF                                                        | CEBPB                                                                                                       |
| chr10:44757106     | rs518594   | 2b               | CXCL12            | <i>Downstream intergenic</i> |      | E2A<br>NRSE<br>NRSF                                         | FOXM1<br>NFIC<br>MAX<br>EBF1<br>TBL1XR1                                                                     |
| chr4:57824931      | rs7687767  | 1d               | CECR6             |                              |      | Sox8                                                        | FOXA1                                                                                                       |
| chr11:5759712      | rs93138    | 1f               | SWAP70            | <i>Intron8</i>               |      |                                                             |                                                                                                             |
|                    | rs360136   | 1f               | SWAP70            | <i>Exon13</i>                |      |                                                             |                                                                                                             |
| chr:457798188      | rs2227901  | 1f               | REST-NOA1         | <i>Exon6</i>                 |      |                                                             | SPI1                                                                                                        |
| chr:1567442595     | rs17293632 | 2a               | SMAD3             | <i>Intron4</i>               |      | Bach1<br>AP-1<br>JundM2<br>Pou1f1<br>Pou3f1<br>Sox5<br>JDP2 | SIN3A<br>TCF7L2<br>TFAP2A<br>TFAP2C<br>ZNF217<br>POLR2A<br>STAT1<br>MXI1<br>TAF1<br>E2F1<br>POLR2A<br>HDAC1 |

(Continued)



**Table 4.** Continued

| Coordinate 0-based | SNP ID     | RegulomeDB score | Gene/Locus | Position | eQTL | Motif                                               | Protein-binding                                                                                                                                                                                        |
|--------------------|------------|------------------|------------|----------|------|-----------------------------------------------------|--------------------------------------------------------------------------------------------------------------------------------------------------------------------------------------------------------|
|                    |            |                  |            |          |      |                                                     | TCF7L2<br>MYC<br>POLR2A<br>ESR1<br>EP300<br>CDX2<br>HNF4A<br>CEBPB<br>EP300<br>FOS<br>FOSL1<br>GATA3<br>JUNB<br>JUN<br>MYC<br>NR2F2<br>NR3C1<br>RAD21<br>RCOR1<br>TCF12<br>JUND<br>MAFK<br>EGR1<br>MAX |
| chr15:67441996     | rs18866316 | 2b               | SMAD3      | Exon4    |      | AIRE<br>Elf3<br>Srf<br>Tcf3<br>Tcfap2e              | ESR1<br>NR3C1<br>POLR2A                                                                                                                                                                                |
| chr15:67448898     | rs8032739  | 2b               | MTERF      | Intron4  |      | SRF                                                 | CEBPB<br>FOS<br>MYC<br>STAT3                                                                                                                                                                           |
| chr9:22098573      | rs4977574  | 2c               | CDKN2BAS1  | Intron16 |      | AR<br>NR3C1<br>NR3C2<br>Ar<br>Elk-1<br>c-Ets-1(p54) | AR                                                                                                                                                                                                     |

associated with essential hypertension in Finnish population (20, 21).

The *CYP17A1-CNNM2-NT5C2* gene region has the highest number of regulatory SNPs, including one GWAS significant SNP, rs12413409. This locus affects diastolic blood pressure, systolic blood pressure and body mass index. All three measures are important risk factors for CAD (22). There are 25 putative regulatory SNPs in LD with rs12413409 that are located across four genes on chromosome 10 (*CNNM2*, *NT5C2*, *AS3MT* and *BORCS7/ASMT*) but affect the expression of same protein

USMG5. These findings suggest that USMG5 should be investigated as an important player for CAD pathogenesis. USMG5 (upregulated during skeletal muscle growth protein 5) is also known as diabetes-associated protein in insulin-sensitive tissues that plays a crucial role in the maintenance of ATP synthase structure in mitochondria (23). Chen et al. (24) have purified this protein from bovine heart mitochondria and suggested its role in cell energy metabolism.

*APOE-APOC1/TOMM40/rs2075650* is present in the *TOMM40* gene region near the *APOE-C1* cluster.

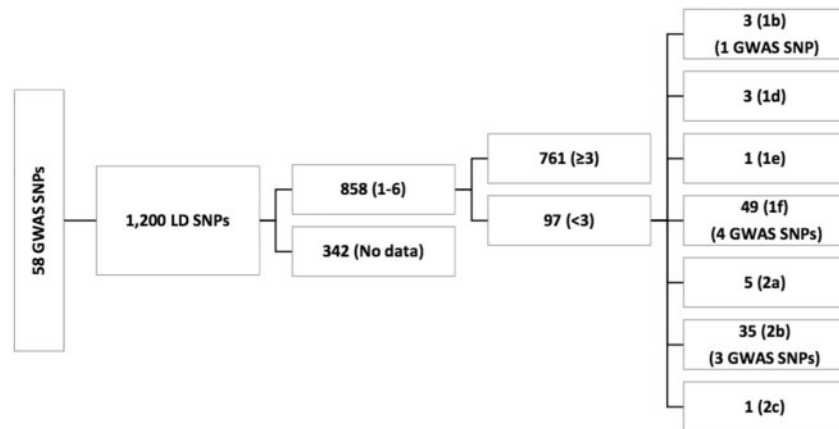

**Figure 1.** 58 GWAS ANPs in LD with 1200 SNPs. We used SNAP webportal to determine LD SNPs. These 1200 SNPs were further evaluated by RegulomeDB to identify their functional role. RegulomeDB did not provide data for 342 SNPs. A total of 858 SNPs returned the scores of 1–6 by RegulomeDB. Of those 858 SNPs, 97 returned the scores of <3. Among 97 functional SNPs, only 8 were GWAS SNPs. Lower the RegulomeDB score, more evidence of functionality.

*TOMM40* encodes TOMM40 protein, which is an important subunit 40 of outer mitochondrial membrane protein complex. rs2075650 risk allele has shown an association with low levels of CRP in CAD patients (25).

rs46522, an intronic SNP in Ubiquitin-conjugating enzyme E2Z (*UBE2Z*) gene region returns a RegulomeDB score of 1f. This SNP is associated with CAD in Iranian and Han Chinese populations (26, 27). The exact mechanism by which genetic alteration in *UBE2Z* can attribute to the CAD risk is not yet clear; however, rs46522 is in strong LD with the causal SNPs in gastric inhibitory peptide (GIP) gene that encodes GIP protein, a protein that modifies the glucose and lipid metabolism potentially mediating known CAD risk factors.

*ZNF259-APOA5/APOA1/rs964184* is also an important regulatory SNP. *ZNF259* protein polymorphism has been associated with metabolic syndrome in Chinese population. Aung et al. (28) have also shown its association with lipid levels. *ZNF259* is located close to *APOA5*. Overexpression of *APOA5* in mice reduces plasma triglyceride levels and mice lacking *APOA5* have hypertriglyceridemia (29).

*COL4A2/rs4773144* has been identified as functional lead SNP by RegulomeDB (score = 2b). This gene controls collagen proliferation, indicating a potential functional role in atherosclerotic plaque strengthening (30).

*SMG6/rs2281727* is an intronic SNP. The potential function of *SMG6* in CAD is not yet established. This gene promotes the endonuclease activity and is responsible for protection of telomere ends of chromosomes (16).

Although regulatory elements are most often found in non-coding regions of the genome, we found 5 loci with exonic regulatory SNPs (*VAMP8/rs1009*, *CNNM2/rs943037*, *GIP/rs2291725*, *KIAA1462/rs3739998* and

*UBE2Z/rs15563*), indicating the presence of regulatory signals inside the coding sequences as well.

USF1 is an upstream transcription factor whose binding is affected by three SNPs (*GIP/rs4794004*, *FES/rs1894401*, *HHIPL1/rs28391527*), suggests a potential functional link between *FES*, *GIP* and *HHIPL1* (31).

RegulomeDB identified three important functional SNPs affecting CAD phenotype. Among these, *REST-NOA1/rs17087335* is the lead GWAS SNP that encodes a transcription factor which suppresses the voltage gated sodium and potassium channels and it has shown to maintain vascular smooth muscle cells in non-proliferative phase (32). *SWAP70/rs10840293* encodes a signaling molecule that is implicated in cell adhesion and migration and it appears to be a potential regulator of leukocyte migration and their adhesion to endothelial cells (33). *SMAD3* is a major regulator of TGF- $\beta$ . A study on mice has shown that mutations in this gene lead to decreased connective tissue deposition in response to vascular injury (34).

It should be noted that 342 SNPs had returned ‘No Data’ when queried by RegulomeDB. This suggests that current evidence does not support a functional role for those variants. Our results also showed that some loci harbor markedly more regulatory SNPs as compared with other regions. We caution against interpreting this finding to mean that one region is more functionally relevant, as regions with ‘fewer’ functional SNPs may have yet to be interrogated as thoroughly and thus have fewer annotations.

Since these loci are mostly in Europeans, and only 5 of them are replicated in South Asians (35), the findings may not be as relevant to other populations as they are to Europeans as genetic effects can differ across populations. The cause of this varying association with disease phenotype may be the ethnic admixture resulting in population

stratification. It is also noteworthy that robust associations of variants with different diseases have been reported in Europeans while other populations (Africans, Asians and Hispanics) failed to demonstrate those associations (36, 37).

Though the cellular mechanisms underlying CAD pathogenesis are established, the molecular basis is not yet agreed upon. Comprehending the molecular basis of disease is crucial before pathogenesis is completely described. The study has identified 97 regulatory SNPs associated with CAD. In summary, our results highlight the importance of considering both disease-associated SNPs and those SNPs in LD, as well as the regulatory function of these SNPs to help identify the causal genetic mechanisms of CAD. The methods which we have implemented here can inform planning of more complete and better directed functional genomic studies.

## Supplementary data

Supplementary data are available at *Database* Online.

## Funding

This study was partially supported by Higher Education Commission of Pakistan and the US National Institutes of Health grants (AG030653 and AG041718).

*Conflict of interest.* None declared.

## References

- Alexander,R.P., Fang,G., Rozowsky,J. *et al.* (2010) Annotating non-coding regions of the genome. *Nat. Rev. Genet.*, 11, 559–571.
- Cheema,A.N., Bhatti,A., Wang,X. *et al.* (2015) APOE gene polymorphism and risk of coronary stenosis in Pakistani population. *Biomed. Res. Int.*, 2015, e587465.
- Chen,Q., Steven,E.R., Candace,M.A. *et al.* (2003) APOE polymorphism and angiographic coronary artery disease severity in the Women's Ischemia Syndrome Evaluation (WISE) study. *Atherosclerosis*, 169, 159–167.
- Afroze,D., Yousuf,A., Trambo,N.A. *et al.* (2015) ApoE gene polymorphism and its relationship with coronary artery disease in ethnic Kashmiri population. *Clin. Exp. Med.*, 16, 551–556.
- Wang,C., Zhou,X., Ye,S. *et al.* (2006) Combined effects of apoE-CI-CII cluster and LDL-R gene polymorphisms on chromosome 19 and coronary artery disease risk. *Int. J. Hyg. Environ. Health*, 209, 265–273.
- Lohmueller,K.E., Pearce,C.L., Pike,M. *et al.* (2003) Meta-analysis of genetic association studies supports a contribution of common variants to susceptibility to common disease. *Nat. Genet.*, 33, 177–182.
- Roberts,R. (2014) Genetics of coronary artery disease. *Circ. Res.*, 114, 1890–1903.
- Pennisi,E.G. (2012) ENCODE project writes eulogy for junk DNA. *Science*, 337, 1159–1161.
- Johnston,J.J., and Biesecker,L.G. (2013) Databases of genomic variation and phenotypes: existing resources and future needs. *Hum. Mol. Genet.*, 22, R27–R31.
- Bjorkegren,J.L., Kovacic,J.C., Dudley,J.T., and Schadt,E.E. (2015) Genome-wide significant loci: how important are they? Systems genetics to understand heritability of coronary artery disease and other common complex disorders. *J. Am. Coll. Cardiol.*, 65, 830–845.
- Rosenthal,S.L., Barmada,M.M., Wang,X. *et al.* (2014) Connecting the dots: potential of data integration to identify regulatory SNPs in late-onset Alzheimer's disease GWAS findings. *PLoS One*, 9, e95152.
- Deloukas,P., Kanoni,S., Willenborg,C. *et al.* (2013) Large-scale association analysis identifies new risk loci for coronary artery disease. *Nat. Genet.*, 45, 25–33.
- Nikpay,M., Goel,A., Won,H.H. *et al.* (2015) A comprehensive 1,000 Genomes-based genome wide association meta-analysis of coronary artery disease. *Nat. Genet.*, 47, 1121–1130.
- Johnson,A.D., Handsaker,R.E., Pulit,S.L. *et al.* (2008) SNAP: a web-based tool for identification and annotation of proxy SNPs using HapMap. *Bioinformatics*, 24, 2938–2939.
- Boyle,A.P., Hong,E.L., Hariharan,M. *et al.* (2012) Annotation of functional variation in personal genomes using RegulomeDB. *Genome Res.*, 22, 1790–1797.
- Gibbs,R.A., Belmont,J.W., Hardenpol,P. *et al.* (2003) The international HapMap project. *Nature*, 426, 789–796.
- Anand,S.S., Xie,C., Pare,G. *et al.* (2009) Genetic variants associated with myocardial infarction risk factors in over 8000 individuals from five ethnic groups: The INTERHEART Genetics Study. *Circ. Cardiovasc. Genet.*, 2, 16–25.
- De Souza,N. (2012) The ENCODE project. *Nat. Methods*, 9, 1046.
- Vargas-Alrcon,G., Possadas,R.C., Villarrial,M. *et al.* (2013) Single nucleotide polymorphisms within LIPA (Lysosomal Acid Lipase A) gene are associated with susceptibility to premature coronary artery disease. a replication in the genetic of atherosclerotic disease (GEA) Mexican study. *PLoS One*, 8, e74703.
- Kunna,T., and Nikkari,S.T. (2012) Association of zinc finger, C3HC-type containing 1 (ZC3HC1) rs11556924 genetic variant with hypertension in a finnish population, the TAMRISK study. *J. Hum. Genet.*, 57, 46–51.
- Bassermann,F., Vonz-Klitlinget,C., Munch,S. *et al.* (2005) NIPA defines an SCF-type mammalian E3 ligase that regulates mitotic activity. *Cell*, 122, 45–57.
- Woudenberg,M.V., Shin,J., Bernard,M. *et al.* (2015) CYP17A1 and blood pressure reactivity to stress in adolescence. *Int. J. HTN*, 2015, e734586.
- Ohsakaya,S., Fujikawa,M., Hisabori,T., and Yoshida,M. (2011) Knockdown of DAPIT (diabetes-associated protein in insulin-sensitive tissue) results in loss of ATP synthase in mitochondria. *J. Biol. Chem.*, 286, 20292–20296.
- Chen,R., Fearnley,I.M., Peak-Chew,S.Y., and Walker,J.E. (2004) The phosphorylation of subunits of complex I from bovine heart mitochondria. *J. Biol. Chem.*, 279, 26036–26045.
- Christiansen,M.K., Larsen,S.B., Nyegaard,M. *et al.* (2017) Coronary artery disease associated genetic variants and biomarkers of inflammation. *PLoS One*, 12, e0180365.

26. Bastami, M. *et al.* (2017) *cj Diabetes Res*, 2017, e4501794.
27. Lu, D., Huan, J., Xiaowei, M. *et al.* (2017) s46522 in the ubiquitin-conjugating enzyme E2Z gene is associated with the risk of coronary artery disease in individuals of Chinese Han population with type 2 diabetes. *J. Diabetes Res.*, 2017, e4501794.
28. Aung, L.H.H., Yin, R.W., Wu, D.F. *et al.* (2014) Association of the variants in the *BUD13-ZNF259* genes and the risk of hyperlipidaemia. *J. Cell. Mol. Med.*, 18, 1417–1428.
29. Do, R., Stitzel, N.O., Won, H.H. *et al.* (2015) Exome sequencing identifies rare LDLR and APOA5 alleles conferring risk for myocardial infarction. *Nature*, 518, 102–106.
30. Turner, A.W., Nikpay, M., Silva, M. *et al.* (2015) Functional interaction between *COL4A1/COL4A2* and *SMAD3* risk loci for coronary artery disease. *Atherosclerosis*, 242, 543–552.
31. Wang, T., Furey, T.S., Connelly, J.J. *et al.* (2009) A general integrative genomic feature transcription factor binding site prediction method applied to analysis of USF1 binding in cardiovascular disease. *Hum. Genomics*, 3, 221–235.
32. Cheong, A., Bingham, A.J., Li, J. *et al.* (2005) Downregulated REST transcription factor is a switch enabling critical potassium channel expression and cell proliferation. *Mol. Cell*, 20, 45–52.
33. Fairfax, B.P., Humburg, P., Makino, S. *et al.* (2014) Innate immune activity conditions the effect of regulatory variants upon monocyte gene expression. *Science*, 343, e1246949.
34. Ashcroft, G.S., Yan, X., Glick, A.B. *et al.* (1999) Mice lacking Smad3 show accelerated wound healing and an impaired local inflammatory response. *Nat. Cell Biol.*, 1, 1260–1266.
35. Peden, J.F., Hopewell, J.C., and Saleheen, D. (2011) A genome-wide association study in Europeans and South Asians identifies five new loci for coronary artery disease. *Nat. Genet.*, 43, 339–344.
36. Farrer, L.A., Cupples, L.A., Haines, J.L. *et al.* (1997) Effects of age, sex, and ethnicity on the association between apolipoprotein E genotype and Alzheimer disease. A meta-analysis. APOE and Alzheimer Disease Meta-Analysis Consortium. *JAMA*, 278, 1349–1356.
37. Tang, M.X., Stern, Y., Marder, K. *et al.* (1998) The APOE-epsilon4 allele and the risk of Alzheimer disease among African Americans, whites, and Hispanics. *JAMA*, 279, 751–755.
